# Supplementary material
Source: PubMed Central journal article supplement (PMC4346515)

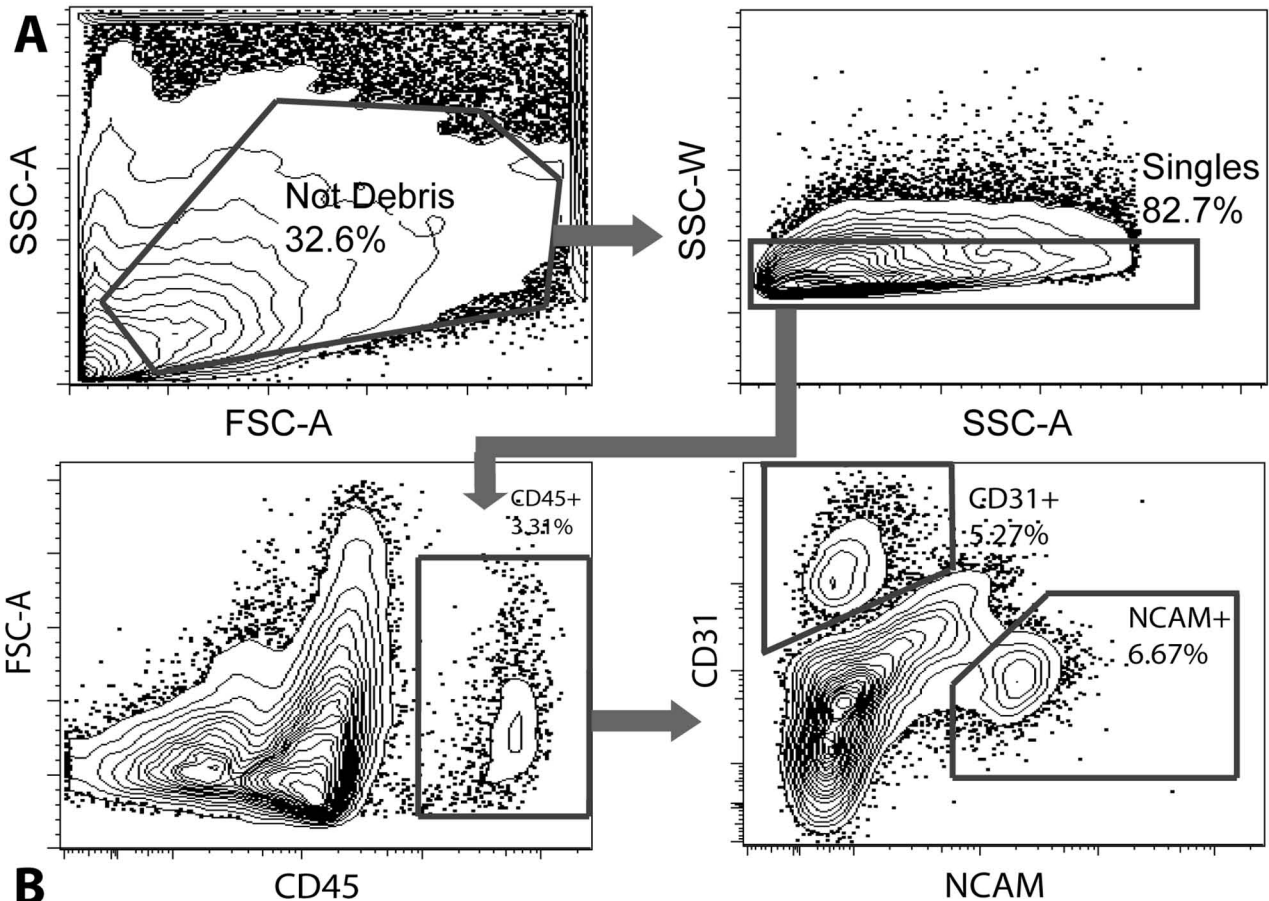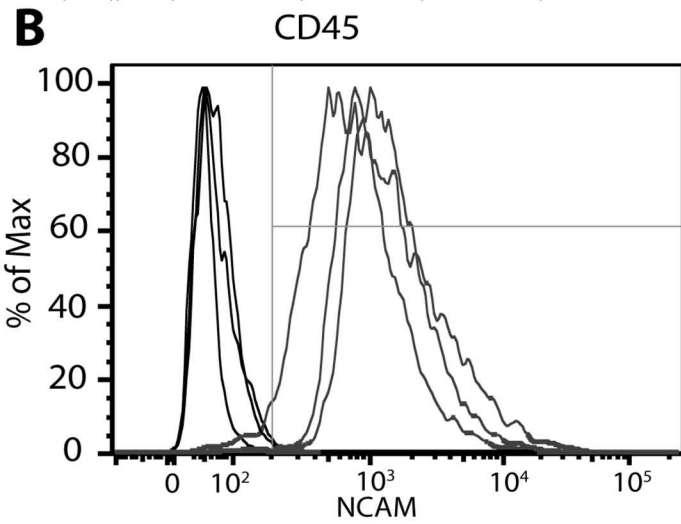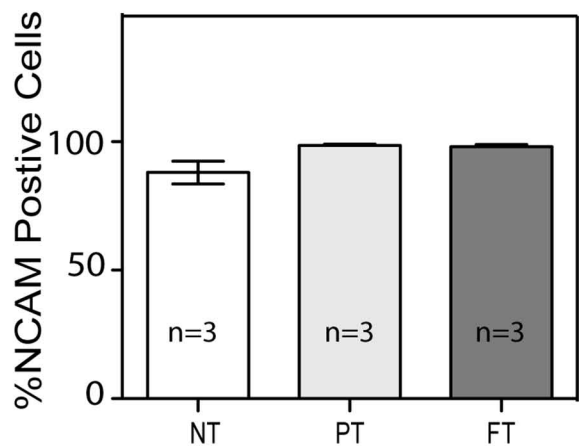

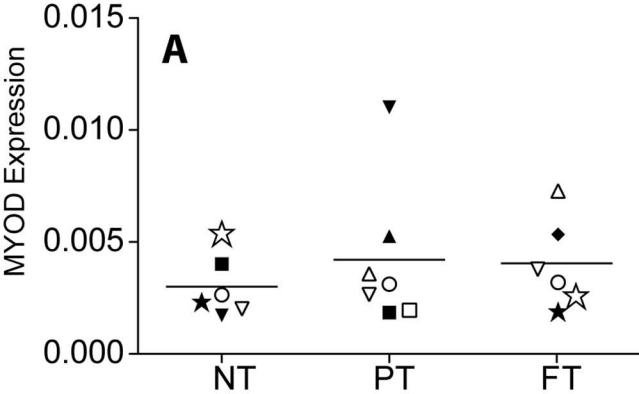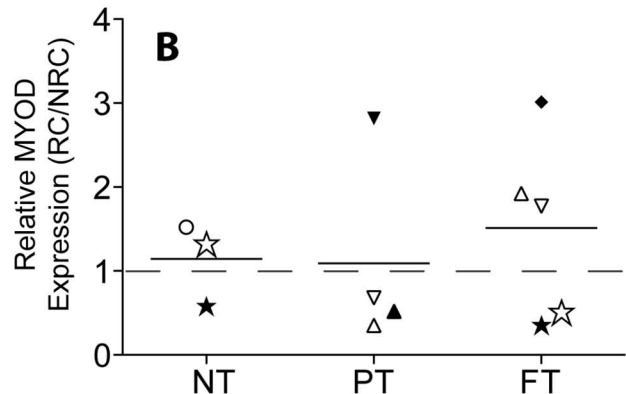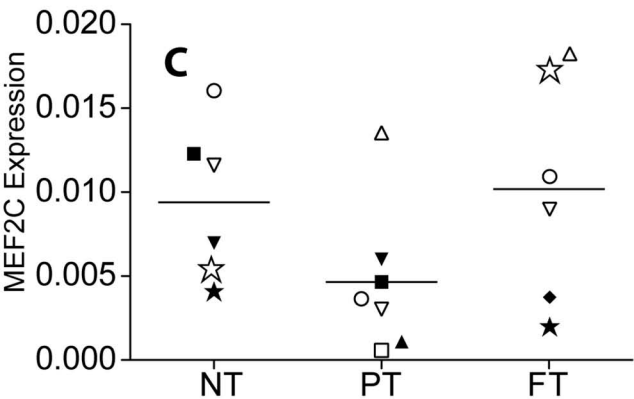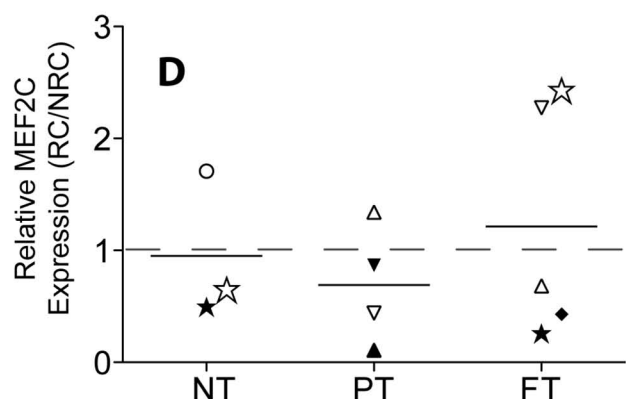

Supplement: NIHMS643609-supplement-Supp_FigureS1-S2.pdf [file NIHMS643609-supplement-Supp_FigureS1-S2.pdf]
